# Supplementary material for: Sodium Alginate as a Potential Therapeutic Filler: An In Vivo Study in Rats
Source: PubMed Central journal article supplement (PMC7589138; doi:10.3390/md18100520), 2020-10-19
Supplement: marinedrugs-18-00520-s001.pdf [file marinedrugs-18-00520-s001.pdf]

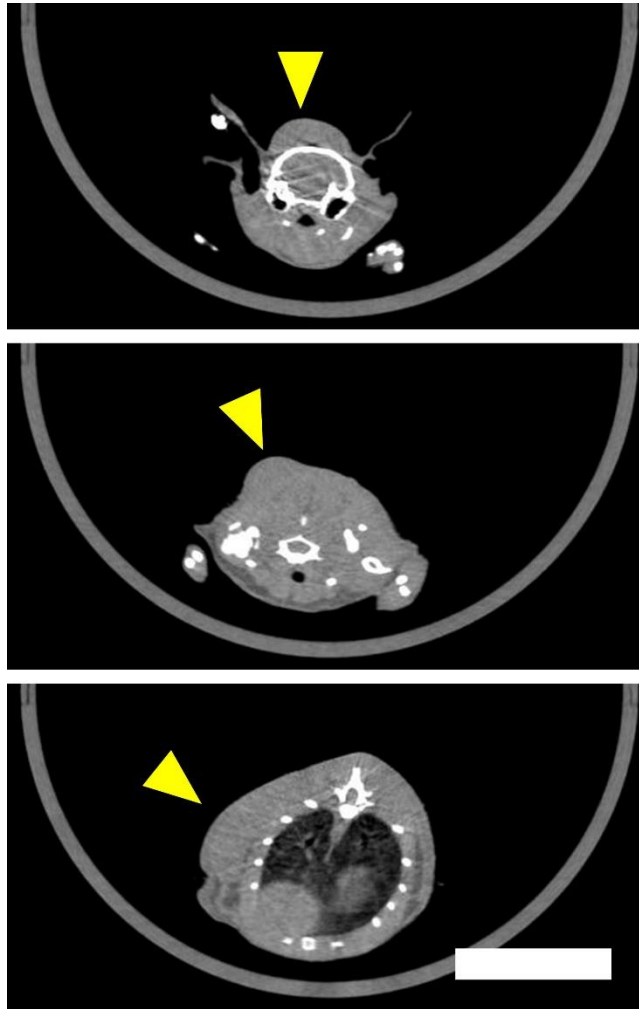

**Figure S1.** Representative images of a micro X-ray computed tomography system immediately after injection of sodium alginate. (Above) 0.2 mL injected onto the parietal periosteum. (Middle) 0.1 mL injected intradermally. (Below) 0.5 mL injected subcutaneously. Scale bars = 30 mm.

|          |                                                                                      |
|----------|--------------------------------------------------------------------------------------|
| Severe   | 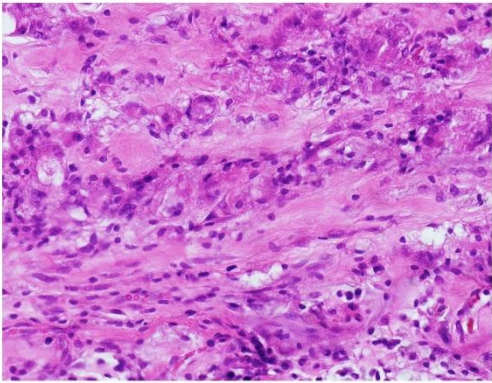   |
| Moderate |    |
| Mild     |   |
| Absent   |  |

Figure S2. Visual scoring scale for granulomatous changes

**Table S1.** The results are shown as means  $\pm$  standard error. The numbers are rounded off to the first decimal place. Four rats for each test substance (n = 4). Some bulges were flattened, and their diameters could not be measured (\*n = 3; †n = 1; N/A, n = 0). SA: sodium alginate, SH: sodium hyaluronate.

|    |                     | Diameter [mm]  |                |                |                 |                 |
|----|---------------------|----------------|----------------|----------------|-----------------|-----------------|
|    |                     | Day 0          | 4 weeks        | 8 weeks        | 12 weeks        | 24 weeks        |
| A1 | Onto the periosteum | 12.3 $\pm$ 0.3 | 15.8 $\pm$ 1.6 | 16.8 $\pm$ 1.7 | 15.2†           | N/A             |
|    | Intradermally       | 10.8 $\pm$ 0.5 | 13.9 $\pm$ 0.6 | 13.8 $\pm$ 0.9 | 14.4 $\pm$ 1.7  | 13.4 $\pm$ 0.9  |
|    | Subcutaneously      | 17.7 $\pm$ 0.3 | 29.6 $\pm$ 0.7 | 27.0 $\pm$ 0.7 | 28.8 $\pm$ 1.3  | 29.2 $\pm$ 1.6  |
| A2 | Onto the periosteum | 12.5 $\pm$ 0.2 | 16.6 $\pm$ 0.8 | 16.5 $\pm$ 1.4 | 14.9†           | N/A             |
|    | Intradermally       | 10.4 $\pm$ 0.4 | 14.3 $\pm$ 0.5 | 13.9 $\pm$ 1.1 | 15.4 $\pm$ 1.0  | 16.3 $\pm$ 0.3  |
|    | Subcutaneously      | 18.3 $\pm$ 0.1 | 29.7 $\pm$ 1.0 | 30.1 $\pm$ 0.7 | 31.8 $\pm$ 0.8  | 33.1 $\pm$ 1.2  |
| A3 | Onto the periosteum | 12.7 $\pm$ 0.2 | 14.8 $\pm$ 0.8 | 14.2 $\pm$ 0.8 | 17.0†           | N/A             |
|    | Intradermally       | 11.3 $\pm$ 0.2 | 13.7 $\pm$ 0.4 | 15.7 $\pm$ 1.2 | 14.5 $\pm$ 1.4* | 14.1 $\pm$ 0.7* |
|    | Subcutaneously      | 18.6 $\pm$ 0.1 | 29.9 $\pm$ 0.4 | 29.5 $\pm$ 0.7 | 34.6 $\pm$ 1.1  | 30.9 $\pm$ 1.1  |
| A4 | Onto the periosteum | 11.6 $\pm$ 0.5 | 17.8 $\pm$ 0.9 | 16.7 $\pm$ 0.4 | 15.4 $\pm$ 0.5  | 14.9 $\pm$ 0.9  |
|    | Intradermally       | 10.8 $\pm$ 0.2 | 13.7 $\pm$ 0.3 | 12.9 $\pm$ 0.7 | 13.4 $\pm$ 1.0  | 12.0 $\pm$ 0.9  |
|    | Subcutaneously      | 18.2 $\pm$ 0.3 | 26.9 $\pm$ 0.4 | 27.0 $\pm$ 0.8 | 26.0 $\pm$ 0.8  | 24.7 $\pm$ 1.1  |
| A5 | Onto the periosteum | 12.5 $\pm$ 0.1 | 17.1 $\pm$ 1.1 | 14.8 $\pm$ 0.7 | 15.1 $\pm$ 0.5* | 11.3†           |
|    | Intradermally       | 10.9 $\pm$ 0.3 | 14.5 $\pm$ 0.5 | 15.8 $\pm$ 0.7 | 16.2 $\pm$ 1.4  | 16.1 $\pm$ 0.6  |
|    | Subcutaneously      | 18.1 $\pm$ 0.4 | 30.6 $\pm$ 0.3 | 31.6 $\pm$ 0.8 | 34.2 $\pm$ 1.0  | 30.1 $\pm$ 1.8  |
| A6 | Onto the periosteum | 12.5 $\pm$ 0.3 | 16.8 $\pm$ 0.5 | 15.0 $\pm$ 0.6 | N/A             | N/A             |
|    | Intradermally       | 10.4 $\pm$ 0.5 | 14.8 $\pm$ 0.4 | 16.1 $\pm$ 1.0 | 16.0 $\pm$ 0.5  | 16.6 $\pm$ 0.9  |
|    | Subcutaneously      | 18.0 $\pm$ 0.4 | 30.0 $\pm$ 0.7 | 29.4 $\pm$ 0.4 | 33.2 $\pm$ 0.6  | 30.8 $\pm$ 1.8  |
| A7 | Onto the periosteum | 12.6 $\pm$ 0.1 | 18.4 $\pm$ 1.0 | 17.8 $\pm$ 0.7 | 15.9 $\pm$ 1.2  | 14.1 $\pm$ 0.8* |
|    | Intradermally       | 10.3 $\pm$ 0.3 | 13.4 $\pm$ 0.5 | 12.9 $\pm$ 0.5 | 13.0 $\pm$ 0.6  | 11.6 $\pm$ 0.8  |
|    | Subcutaneously      | 18.0 $\pm$ 0.4 | 27.5 $\pm$ 1.4 | 28.2 $\pm$ 2.1 | 26.5 $\pm$ 1.5  | 25.8 $\pm$ 3.4  |
| A8 | Onto the periosteum | 12.8 $\pm$ 0.4 | 18.6 $\pm$ 0.5 | 18.2 $\pm$ 0.7 | 16.2 $\pm$ 0.9  | 16.3 $\pm$ 0.7* |
|    | Intradermally       | 10.9 $\pm$ 0.2 | 14.3 $\pm$ 0.5 | 14.7 $\pm$ 0.9 | 14.7 $\pm$ 1.1  | 13.6 $\pm$ 0.8  |
|    | Subcutaneously      | 18.0 $\pm$ 0.5 | 29.0 $\pm$ 0.5 | 29.4 $\pm$ 0.6 | 31.5 $\pm$ 0.7  | 26.1 $\pm$ 2.0  |
| A9 | Onto the periosteum | 12.2 $\pm$ 0.2 | 17.1 $\pm$ 1.1 | 17.1 $\pm$ 0.6 | 13.4†           | N/A             |
|    | Intradermally       | 10.8 $\pm$ 0.2 | 15.8 $\pm$ 0.5 | 16.8 $\pm$ 1.4 | 18.3 $\pm$ 1.0  | 15.3 $\pm$ 1.0  |
|    | Subcutaneously      | 18.3 $\pm$ 0.4 | 31.7 $\pm$ 0.9 | 30.6 $\pm$ 1.4 | 33.5 $\pm$ 1.1  | 28.7 $\pm$ 1.1  |
| SH | Onto the periosteum | 12.4 $\pm$ 0.4 | 14.2 $\pm$ 0.6 | 13.6 $\pm$ 0.8 | 12.1 $\pm$ 0.4  | 10.0 $\pm$ 0.2  |
|    | Intradermally       | 10.6 $\pm$ 0.6 | 11.4 $\pm$ 0.9 | 9.9 $\pm$ 0.6  | 8.9 $\pm$ 0.5   | 7.6 $\pm$ 0.5   |
|    | Subcutaneously      | 17.4 $\pm$ 1.0 | 19.4 $\pm$ 1.3 | 18.3 $\pm$ 1.1 | 17.9 $\pm$ 2.0  | 16.8 $\pm$ 1.2  |

**Table S2.** The results are shown as means  $\pm$  standard error. The numbers are rounded off to the second decimal place. Four rats for each test substance (n = 4). Some boundaries of the injected substances were unclear in the CT images, and their volumes could not be measured (\*n = 3; ‡ n = 2; †n = 1; N/A, n = 0). SA: sodium alginate, SH: sodium hyaluronate.

|    |                     | Volume [mL]     |                   |                   |                   |                   |
|----|---------------------|-----------------|-------------------|-------------------|-------------------|-------------------|
|    |                     | Day 0           | 4 weeks           | 8 weeks           | 12 weeks          | 24 weeks          |
| A1 | Onto the periosteum | 0.52 $\pm$ 0.03 | N/A               | N/A               | N/A               | 0.25†             |
|    | Intradermally       | 0.25 $\pm$ 0.01 | 0.17 $\pm$ 0.02 ‡ | 0.10†             | 0.12†             | N/A               |
|    | Subcutaneously      | 1.23 $\pm$ 0.08 | 0.53 $\pm$ 0.01*  | 0.72 $\pm$ 0.11 ‡ | 0.62 $\pm$ 0.14 ‡ | 0.54 $\pm$ 0.04 ‡ |
| A2 | Onto the periosteum | 0.56 $\pm$ 0.03 | N/A               | N/A               | N/A               | N/A               |
|    | Intradermally       | 0.25 $\pm$ 0.01 | N/A               | N/A               | N/A               | N/A               |
|    | Subcutaneously      | 1.23 $\pm$ 0.05 | 0.41†             | 0.80 $\pm$ 0.11*  | N/A               | 0.73 $\pm$ 0.11 ‡ |
| A3 | Onto the periosteum | 0.55 $\pm$ 0.02 | N/A               | N/A               | N/A               | N/A               |
|    | Intradermally       | 0.25 $\pm$ 0.02 | N/A               | N/A               | N/A               | N/A               |
|    | Subcutaneously      | 1.22 $\pm$ 0.09 | 0.67†             | 0.71†             | 0.46†             | 0.76 $\pm$ 0.05 ‡ |
| A4 | Onto the periosteum | 0.51 $\pm$ 0.03 | 0.47 $\pm$ 0.08*  | 0.33 $\pm$ 0.09*  | 0.45 $\pm$ 0.02 ‡ | 0.27 $\pm$ 0.10 ‡ |
|    | Intradermally       | 0.26 $\pm$ 0.01 | 0.14 $\pm$ 0.03   | 0.17 $\pm$ 0.04   | 0.14 $\pm$ 0.02   | 0.08 ‡            |
|    | Subcutaneously      | 1.17 $\pm$ 0.09 | 0.87 $\pm$ 0.06   | 0.85 $\pm$ 0.09   | 0.66 $\pm$ 0.03   | 0.93 $\pm$ 0.09   |
| A5 | Onto the periosteum | 0.53 $\pm$ 0.04 | N/A               | N/A               | N/A               | N/A               |
|    | Intradermally       | 0.26 $\pm$ 0.01 | 0.16 $\pm$ 0.01   | 0.16 $\pm$ 0.03 ‡ | 0.10†             | N/A               |
|    | Subcutaneously      | 1.29 $\pm$ 0.14 | 0.76 $\pm$ 0.12 ‡ | 0.96 $\pm$ 0.02*  | 0.67 $\pm$ 0.19 ‡ | 0.89 $\pm$ 0.17*  |
| A6 | Onto the periosteum | 0.58 $\pm$ 0.03 | N/A               | N/A               | N/A               | N/A               |
|    | Intradermally       | 0.25 $\pm$ 0.01 | 0.11*             | N/A               | N/A               | N/A               |
|    | Subcutaneously      | 1.14 $\pm$ 0.08 | 0.80 $\pm$ 0.07 ‡ | 0.57†             | 0.73†             | 1.01 $\pm$ 0.03 ‡ |
| A7 | Onto the periosteum | 0.63 $\pm$ 0.01 | 0.45 $\pm$ 0.03 ‡ | 0.42 $\pm$ 0.02 ‡ | 0.44 $\pm$ 0.02 ‡ | 0.30 $\pm$ 0.02 ‡ |
|    | Intradermally       | 0.21 $\pm$ 0.01 | 0.11 $\pm$ 0.01*  | 0.10 $\pm$ 0.01   | 0.20 $\pm$ 0.01 ‡ | 0.16 $\pm$ 0.06 ‡ |
|    | Subcutaneously      | 1.17 $\pm$ 0.10 | 0.82 $\pm$ 0.20*  | 0.67 $\pm$ 0.12   | 0.67 $\pm$ 0.05*  | 0.74 $\pm$ 0.15   |
| A8 | Onto the periosteum | 0.51 $\pm$ 0.02 | 0.47 $\pm$ 0.05 ‡ | 0.36 ‡            | 0.38 $\pm$ 0.08 ‡ | 0.17†             |
|    | Intradermally       | 0.24 $\pm$ 0.02 | 0.22 $\pm$ 0.05   | 0.15 $\pm$ 0.03   | 0.18 $\pm$ 0.02*  | 0.19†             |
|    | Subcutaneously      | 1.05 $\pm$ 0.04 | 0.94 $\pm$ 0.07   | 0.92 $\pm$ 0.16   | 0.71 $\pm$ 0.10*  | 1.20 $\pm$ 0.02*  |
| A9 | Onto the periosteum | 0.55 $\pm$ 0.05 | N/A               | 0.46†             | N/A               | N/A               |
|    | Intradermally       | 0.26 $\pm$ 0.01 | 0.20†             | 0.25†             | N/A               | N/A               |
|    | Subcutaneously      | 1.16 $\pm$ 0.08 | 0.81 $\pm$ 0.02 ‡ | 0.79 $\pm$ 0.14 ‡ | N/A               | 0.68†             |
| H  | Onto the periosteum | 0.22 $\pm$ 0.01 | 0.18 $\pm$ 0.03*  | 0.20 $\pm$ 0.01*  | 0.18 $\pm$ 0.03*  | 0.13 $\pm$ 0.01   |
|    | Intradermally       | 0.12 $\pm$ 0.01 | 0.11 $\pm$ 0.01   | 0.08 $\pm$ 0.01   | 0.08 $\pm$ 0.02   | 0.12 $\pm$ 0.01   |
|    | Subcutaneously      | 0.68 $\pm$ 0.10 | 0.41 $\pm$ 0.08   | 0.30 $\pm$ 0.05   | 0.33 $\pm$ 0.04   | 0.35 $\pm$ 0.04   |
